# Supplementary material
Source: publisher figshare collection journal article supplement (https://frontiersin.figshare.com/ndownloader/files/24173789)
Supplement: Supplementary file 1 [file 24173789]

## Sheet: WOLL12
ESM Table 1A LA-ICP-MS data for magmatic zircon grains from sample WOL-12
No.	Corrected isotope ratios						Apparent ages (Ma)					U, Th and Pb content (ppm)									disc.
	207Pb/235U	±2s	206Pb/238U	±2s	error corr.		207Pb/235U	±2s	206Pb/238U	±2s		Approx U	±2s	Approx Th	±2s	Approx Pb	±2s		Th/U		%
Sample WOL-12
1	0.2011	0.01	0.02886	0.00095	0.29758		184.9	8.5	183.3	5.9		92.9	1.9	24.34	0.4	7.42	0.38		0.262002		0.865333
2	0.2145	0.0075	0.03059	0.00074	0.35416		196.5	6.3	194.2	4.6		175.7	2.5	43.04	0.62	13.25	0.42		0.244963		1.17048
3	0.1998	0.0064	0.02943	0.00072	0.54684		184.5	5.4	186.9	4.5		419	12	110.5	4.8	31.1	1.5		0.263723		-1.30081
4	0.2017	0.0097	0.02937	0.00086	0.27164		186	8.1	186.5	5.4		68	1.5	26.89	0.48	7.83	0.5		0.395441		-0.268817
5	0.2094	0.0057	0.02999	0.0006	0.37067		193	4.7	190.4	3.8		222	8	53.3	1.6	15.64	0.35		0.24009		1.34715
6	0.206	0.0073	0.02958	0.00063	0.21989		190.5	6.1	187.9	4		153.5	2.9	42.86	0.72	11.94	0.61		0.279218		1.36483
7	0.2105	0.0075	0.03013	0.00076	0.33716		193.6	6.2	191.3	4.7		196.9	3.3	52.06	0.66	15.55	0.39		0.264398		1.18802
8	0.2146	0.0091	0.0307	0.0011	0.41886		197.1	7.7	195.1	7.1		104.9	3.6	45.3	1.7	13.31	0.52		0.43184		1.01471
9	0.2069	0.0088	0.02987	0.00076	0.39024		189.8	7.3	189.7	4.8		120.9	2.2	32.51	0.53	9.08	0.7		0.2689		0.052687
10	0.2126	0.0081	0.03091	0.00095	0.4152		195.5	6.8	196.1	6		173.9	6.1	50.4	2.4	16.04	0.37		0.289822		-0.306905
11	0.208	0.01	0.02961	0.001	0.20997		190.8	8.7	188	6.2		94.1	1.9	26.75	0.54	8.23	0.91		0.284272		1.46751
12	0.2098	0.0073	0.03081	0.00078	0.2474		192.6	6.1	195.5	4.9		177.5	5.4	61	1.6	18.37	0.41		0.343662		-1.50571
13	0.2108	0.0071	0.03018	0.00074	0.16371		193.5	5.9	191.6	4.6		197	3.2	49.29	0.58	14.44	0.68		0.250203		0.981912
14	0.21	0.0086	0.03017	0.00084	0.17808		192.8	7.2	191.5	5.3		161	3.2	35.2	0.47	10.57	0.47		0.218634		0.674274
15	0.2143	0.008	0.03061	0.00078	0.13074		196.4	6.7	194.3	4.9		200.2	4.3	54.23	0.8	16.21	0.42		0.270879		1.06925
16	0.2041	0.0047	0.02926	0.00072	0.35064		188.3	3.9	185.8	4.5		3269	74	554	10	160.6	0.62		0.169471		1.32767
17	0.21	0.013	0.0305	0.0012	0.27367		192	11	193.5	7.5		80.4	2.4	27.26	0.79	8.15	3.7		0.339055		-0.78125
18	0.208	0.017	0.0295	0.0011	0.33013		191	14	187.6	6.7		66.6	2.2	20.82	0.85	6.17	0.51		0.312613		1.7801
20	0.202	0.011	0.02976	0.00096	0.34648		186.4	9.4	189	6		145.4	9.9	45.2	2.6	12.45	0.88		0.310867		-1.39485
21	0.2105	0.0071	0.03009	0.00082	0.30182		193.4	6	191	5.1		179.7	3.4	45.54	0.84	12.83	0.8		0.253422		1.24095
22	0.2148	0.0066	0.03053	0.0008	0.40066		197.7	5.4	193.8	5		185.8	3.2	55.42	0.83	17.17	0.54		0.298278		1.97269
23	0.2123	0.0097	0.03032	0.00078	0.30473		196	8.1	192.5	4.9		113.2	3.1	31.6	0.67	9.96	0.61		0.279152		1.78571
24	0.205	0.01	0.02911	0.00089	0.31364		188.3	8.5	184.9	5.6		94.9	1.9	23.79	0.46	6.88	0.49		0.250685		1.80563
25	0.2164	0.0085	0.03101	0.0009	0.3172		197.8	7.1	196.7	5.6		113.8	5.5	42.7	2.2	12.45	0.36		0.37522		0.556117

## Sheet: WOLL14
No.	Corrected isotope ratios						Apparent ages (Ma)					U, Th and Pb content (ppm)									disc.
	207Pb/235U	±2s	206Pb/238U	±2s	error corr.		207Pb/235U	±2s	206Pb/238U	±2s		Approx U	±2s	Approx Th	±2s	Approx Pb	±2s		Th/U		%
ESM Table 1B LA-ICP-MS data for magmatic zircon grains from sample WOL-14
1	0.2014	0.0046	0.02892	0.00048	0.23953		186.3	3.9	183.7	3		520	16	58.9	1.3	61.6	1.8		0.113269		1.3956
2	0.1987	0.0057	0.02877	0.00052	0.30393		183.7	4.9	182.8	3.2		448.8	5.4	198.7	2.1	57.8	1.6		0.442736		0.489929
3	0.1965	0.0061	0.02903	0.00049	0.31328		182.9	5.2	184.5	3.1		272.1	5.4	108.7	1.8	34.3	1.1		0.399485		-0.874795
4	0.198	0.011	0.02884	0.00063	0.11826		182	8.8	183.2	4		107.3	2.2	46.99	0.87	13.99	0.79		0.437931		-0.659341
5	0.2008	0.0069	0.02882	0.00054	0.13992		185.3	5.8	183.2	3.4		218	2.2	102.7	1.1	27.3	1.3		0.471101		1.1333
6	0.1985	0.0056	0.0284	0.00049	0.10596		183.3	4.8	180.5	3.1		236.6	4.8	100.3	2.1	24.97	0.91		0.423922		1.52755
7	0.1989	0.0066	0.02849	0.00049	0.11281		183.5	5.5	181.3	3.1		261.1	3	157	1.6	41.1	1		0.601302		1.19891
8	0.2011	0.0053	0.02881	0.00056	0.23989		185.8	4.4	183.1	3.5		492.1	6.6	291	4	74.8	1.9		0.591343		1.45318
9	0.1984	0.0053	0.0286	0.0005	0.11002		183.3	4.5	181.8	3.1		318.4	3	142.2	1.4	37.17	0.93		0.446608		0.818331
10	0.2033	0.0054	0.02912	0.0005	0.16931		187.5	4.5	185	3.1		324.2	6.2	171	3	42.8	1.2		0.527452		1.33333
11	0.1977	0.0061	0.02894	0.00053	0.085298		182.8	5.1	183.9	3.3		283.2	4.3	172.1	2.7	40.6	1.3		0.607698		-0.601751
12	0.194	0.0056	0.02868	0.00051	0.44204		179.6	4.7	182.3	3.2		396.1	5.5	158.6	2.4	37.5	1.3		0.400404		-1.50334
13	0.1977	0.0039	0.02874	0.00049	0.12766		183	3.3	182.6	3.1		560.4	9.2	346.9	5.4	93	1.8		0.619022		0.218579
14	0.1981	0.0051	0.02841	0.00052	0.15414		183.2	4.3	180.6	3.3		550	23	321	13	82.8	3.4		0.583636		1.41921
15	0.1936	0.0056	0.02832	0.00051	0.1371		179.2	4.7	180	3.2		378	23	236	14	59.1	3.3		0.624339		-0.446429
16	0.1964	0.006	0.02857	0.00054	0.10414		182.1	5	181.5	3.4		316.1	7.1	157.1	3.8	37.6	1.5		0.496995		0.329489
17	0.1966	0.0084	0.02841	0.00053	0.055957		181.8	7	180.6	3.3		136.2	3.1	59.9	1.3	19.01	0.82		0.439794		0.660066
18	0.1955	0.0072	0.02859	0.00058	-0.08183		180.8	6.1	181.7	3.6		203.2	2.2	87.16	0.82	28.5	1.3		0.428937		-0.497788
19	0.2001	0.0037	0.02882	0.00048	0.41806		185.1	3.1	183.1	3		1660	21	1173	16	354.2	7.2		0.706627		1.0805
20	0.1995	0.0029	0.02868	0.00045	0.39133		184.6	2.4	182.3	2.8		1416	16	959	11	294.5	3.6		0.67726		1.24594
21	0.1972	0.0075	0.0285	0.00062	0.23557		182.1	6.3	181.1	3.9		262	18	121.7	4	30.6	1.5		0.464504		0.549149
22	0.1992	0.004	0.02886	0.0005	0.33266		184.2	3.4	183.4	3.1		627	17	176.6	4	55.2	1.8		0.281659		0.434311
23	0.2002	0.0061	0.02895	0.00054	0.10358		184.7	5.1	183.9	3.4		193.2	5.2	122.4	3.6	34.1	1.2		0.63354		0.433135
24	0.2001	0.0083	0.02869	0.00066	0.092382		184.4	6.9	182.3	4.1		194.3	4.5	96.3	1.9	26.2	1.1		0.495625		1.13883
25	0.1951	0.0056	0.0288	0.00055	0.17599		181.6	4.7	183	3.5		330	16	253	13	68.2	3.6		0.766667		-0.770925

## Sheet: WOLL15
	ESM Table 1C LA-ICP-MS data for magmatic zircon grains from sample WOL-15
No.	Corrected isotope ratios						Apparent ages (Ma)					U, Th and Pb content (ppm)									disc.
	207Pb/235U	±2s	206Pb/238U	±2s	error corr.		207Pb/235U	±2s	206Pb/238U	±2s		Approx U	±2s	Approx Th	±2s	Approx Pb	±2s		Th/U		%
Sample WOL-15
1	0.1949	0.0063	0.02839	0.00039	0.1401		181	5.3	180.4	2.5		131.7	4.5	78.1	2.7	6.51	0.27		0.593014		0.331492
2	0.1974	0.0041	0.02884	0.00038	0.32691		183.1	3.4	183.2	2.4		342.9	7.1	127.8	2	10.95	0.31		0.372703		-0.054615
3	0.1987	0.0044	0.02918	0.00038	0.22253		183.7	3.7	185.4	2.4		308.2	4.7	121.8	1.7	10.54	0.28		0.395198		-0.925422
4	0.2032	0.0038	0.0291	0.00037	0.49853		187.7	3.2	184.9	2.3		485.3	6.7	186.7	2.2	16.38	0.36		0.38471		1.49174
5	0.1976	0.0042	0.02869	0.00035	0.31753		182.9	3.5	182.4	2.2		299.6	5	139	2.6	11.77	0.27		0.463952		0.273373
6	0.1972	0.003	0.0285	0.00032	0.49864		182.8	2.6	181.2	2		1699	26	427.3	5.6	36.21	0.53		0.251501		0.875274
7	0.2003	0.0073	0.0291	0.00043	0.10357		184.7	6.1	184.9	2.7		94.1	1.1	41.67	0.54	3.77	0.17		0.442827		-0.108284
8	0.2011	0.0069	0.02912	0.00047	0.046024		185.4	5.8	185	2.9		91.9	3	38.1	1.1	3.12	0.14		0.414581		0.21575
9	0.1983	0.0058	0.02875	0.00043	0.10465		183.7	4.8	182.7	2.7		120.7	1.4	65.99	0.87	5.83	0.19		0.546727		0.544366
10	0.1999	0.003	0.02918	0.00032	0.43683		184.9	2.6	185.4	2		1072	19	130.2	2.3	11.66	0.3		0.121455		-0.270416
11	0.2019	0.0046	0.02888	0.00036	0.22945		186.1	3.8	183.5	2.2		268.6	4.1	122.4	1.8	10.2	0.23		0.455696		1.3971
12	0.2006	0.0058	0.0288	0.00041	0.30141		185.1	4.9	183	2.5		160.9	2.6	70.8	1.1	6.12	0.19		0.440025		1.13452
13	0.1956	0.008	0.02848	0.00045	0.21276		181.3	6.7	181	2.8		74.62	0.82	33.89	0.4	2.86	0.13		0.454168		0.165472
14	0.1972	0.0048	0.02862	0.00037	0.22992		182.8	4.1	181.9	2.3		213.8	2.9	88.8	1.1	7.4	0.2		0.415341		0.492341
15	0.2025	0.0042	0.02921	0.00037	0.33627		187.3	3.6	185.6	2.3		380.7	3.7	129.1	1.4	11.18	0.25		0.339112		0.907635
16	0.2007	0.0073	0.02908	0.00042	0.19261		185.9	6.3	184.8	2.7		113.4	3.2	33.68	0.81	3.12	0.14		0.297002		0.591716
17	0.196	0.0026	0.02841	0.00029	0.54783		181.7	2.2	180.6	1.8		4299	58	962	12	80.44	0.99		0.223773		0.605394
18	0.1993	0.0073	0.02874	0.00047	0.10415		184.9	6.3	182.6	3		76.9	2.5	42.9	1.5	3.62	0.18		0.557867		1.24392
19	0.196	0.014	0.02882	0.00046	0.10657		185.1	11	183.2	2.9		62.5	1.6	35.8	1.4	3.12	0.22		0.5728		1.02647
20	0.1979	0.0063	0.02835	0.00043	0.11195		182.8	5.3	180.2	2.7		124.2	1.4	53.76	0.51	4.59	0.14		0.43285		1.42232
21	0.2021	0.0089	0.02877	0.00042	0.10705		185	7.4	182.8	2.6		74.1	1.1	31.1	0.53	2.7	0.11		0.419703		1.18919
